# Supplementary material for: Destabilization of amyloid fibrils on interaction with MoS2-based nanomaterials
Source: PubMed Central journal article supplement — RSC Adv. 2019 Jan 11;9(3):1613–24. doi: 10.1039/c8ra10184a (PMC9059571; doi:10.1039/c8ra10184a), 2019-01-11
Supplement: RA-009-C8RA10184A-s001.pdf [file RA-009-C8RA10184A-s001.pdf]

## Destabilization of Amyloid Fibrils on Interaction with MoS<sub>2</sub> based Nanomaterials

Sathish Kumar Mudedla,<sup>a</sup> N. Arul Murugan<sup>a,\*</sup> V. Subramanian<sup>b \*</sup>, and Hans Agren<sup>a,c,\*</sup>

<sup>a</sup> Division of Theoretical Chemistry and Biology, School of Engineering Sciences in Chemistry, Biotechnology and Health, KTH Royal Institute of Technology, S-106 91 Stockholm, Sweden

<sup>b</sup> Chemical Laboratory, CSIR-Central Leather Research Institute, Adyar, Chennai 600020, India

<sup>c</sup> College of Chemistry and Chemical Engineering, Henan University, Kaifeng, Henan 475004P. R. China

\* To whom correspondence should be addressed.

E-mail: [murugan@kth.se](mailto:murugan@kth.se), [subuchem@hotmail.com](mailto:subuchem@hotmail.com), [hagren@kth.se](mailto:hagren@kth.se)

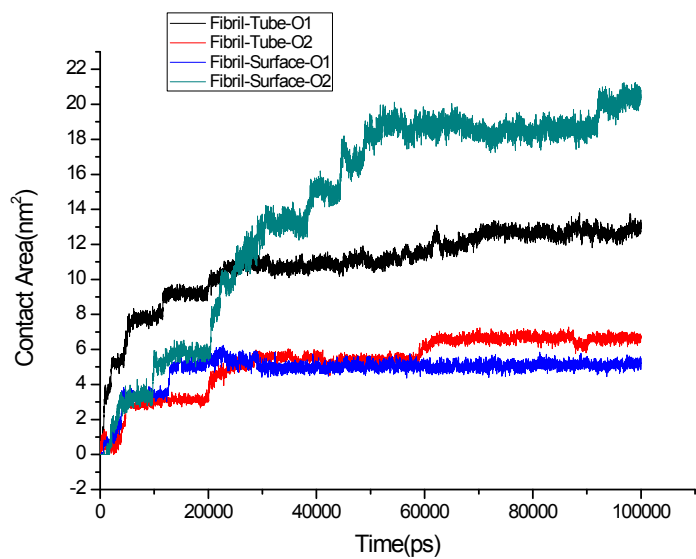

Fig. S1: Contact area between MoS2 based materials and amyloid beta fibril.
